# Supplementary material
Source: HighWire-hosted journal article supplement (https://erj.ersjournals.com/content/55/2/1900514)
Supplement: inline-supplementary-material-1 [file inline-supplementary-material-1.pdf]

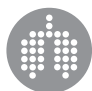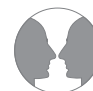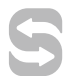

SHAREABLE PDF

# Can circular RNAs be used as prenatal biomarkers for congenital diaphragmatic hernia?

Richard Wagner<sup>1,2,3,4</sup>, Aruni Jha<sup>2,3</sup>, Lojine Ayoub<sup>1,2,3</sup>, Shana Kahnamoui<sup>1,2,3</sup>, Daywin Patel<sup>1,3</sup>, Thomas H. Mahood<sup>2,3</sup>, Andrew J. Halayko<sup>2,3</sup>, Martin Lacher<sup>4</sup>, Christopher D. Pascoe<sup>2,3</sup> and Richard Keijzer<sup>1,2,3</sup>

**Affiliations:** <sup>1</sup>Depts of Surgery, Division of Pediatric Surgery, Pediatrics & Child Health and Physiology & Pathophysiology (Adjunct), University of Manitoba, Winnipeg, MB, Canada. <sup>2</sup>Dept of Physiology and Pathophysiology, University of Manitoba, Winnipeg, MB, Canada. <sup>3</sup>Biology of Breathing Theme, Children's Hospital Research Institute of Manitoba, Winnipeg, MB, Canada. <sup>4</sup>Dept of Pediatric Surgery, University Hospital Leipzig, Leipzig, Germany.

**Correspondence:** Richard Keijzer, Dept of Surgery, Division of Pediatric Surgery, University of Manitoba and Children's Hospital Research Institute of Manitoba, AE402-840 Sherbrook Street Winnipeg, Manitoba, Canada, R3A 1R9. E-mail: richard.keijzer@umanitoba.ca

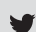

@ERSpublications

**Circular RNAs are dysregulated in lungs of congenital diaphragmatic hernia patients, a malformation of the lung and diaphragm. These results suggest that they can serve as prenatal biomarkers to improve prognostication and diagnostic accuracy.** <http://bit.ly/2Cz7Bzm>

**Cite this article as:** Wagner R, Jha A, Ayoub L, *et al.* Can circular RNAs be used as prenatal biomarkers for congenital diaphragmatic hernia?. *Eur Respir J* 2020; 55: 1900514 [<https://doi.org/10.1183/13993003.00514-2019>].

This single-page version can be shared freely online.

## To the Editor:

Since 2000, more than 400 000 babies worldwide have died of congenital diaphragmatic hernia (CDH), a condition that is occurring as frequently as cystic fibrosis and characterised by underdeveloped lungs (pulmonary hypoplasia), persistent pulmonary hypertension and a diaphragmatic defect [1]. CDH can be diagnosed prenatally with ultrasound and fetal MRI, but outcome prediction and diagnostic accuracy remain imperfect [2]. The observed over expected lung-to-head (O/E LHR) ratio at 22–23 and 32–33 weeks of gestation is currently used to predict CDH outcomes [3]. A prenatal biomarker for the assessment of disease severity and prognostication has not been established yet. In contrast to cystic fibrosis, a common genetic cause has not been identified for CDH, suggesting that epigenetic and environmental factors are involved in the pathogenesis. We have previously discovered that microRNA 200b (miR-200b) is highly dysregulated in hypoplastic human CDH lungs and that miR-200b administration can serve as a prenatal therapy in an animal model for CDH [4, 5].
